# Supplementary material
Source: Springer Nature journal article supplement (https://www.springermedizin.de/resource/supplementary/13045_2012_195_MOESM1_ESM.pdf/9661004)

**Low-Grade Serous Carcinoma**

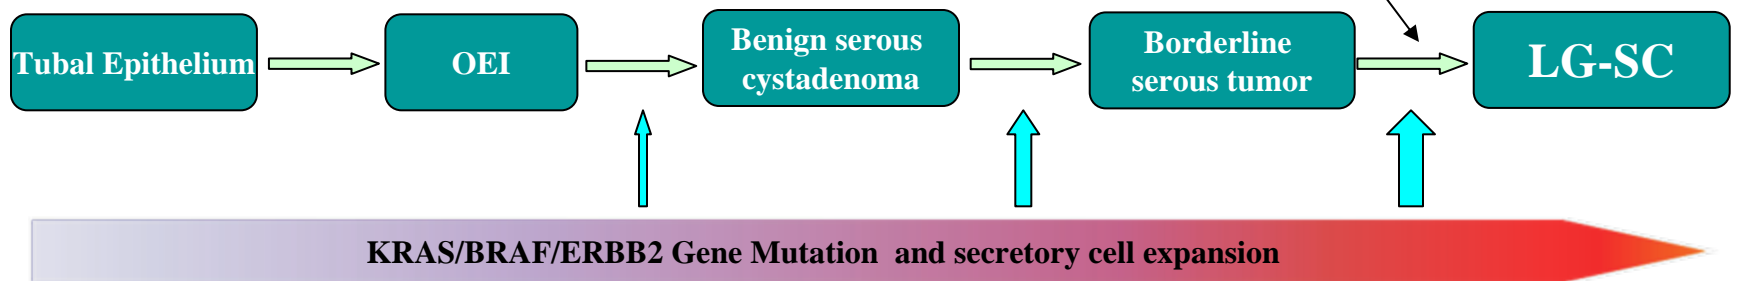

**High-Grade Serous Carcinoma**

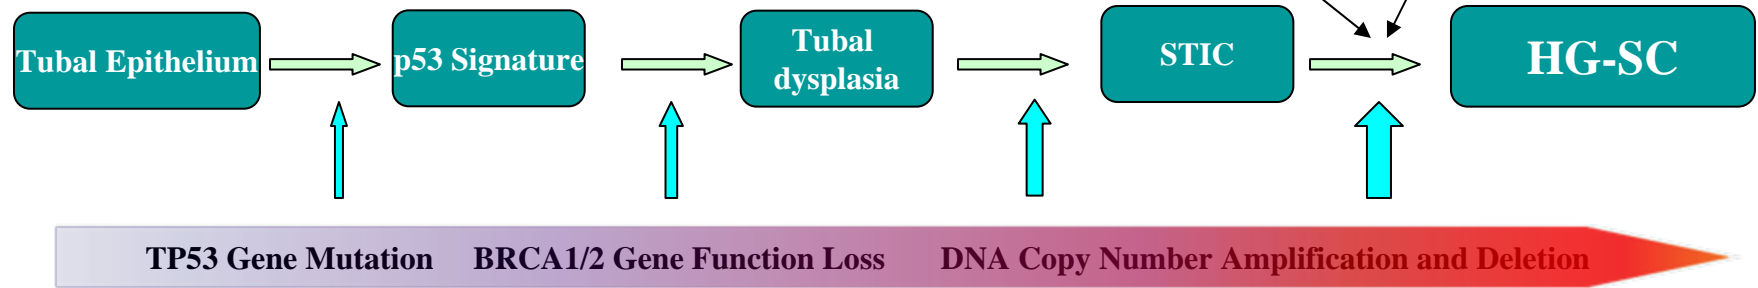

TP53 Mutation

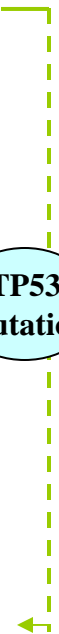

Supplement: MOESM1 [file 9661004]
